# Supplementary material for: Reexamining remission definitions in rheumatoid arthritis: considering the twenty-eight–joint Disease Activity Score, C-reactive protein level and patient global assessment
Source: PubMed Central journal article supplement — RMD Open. 2021 Nov 11;7(3):e002034. doi: 10.1136/rmdopen-2021-002034 (PMC8587341; doi:10.1136/rmdopen-2021-002034), 2021-11-11
Supplement: rmdopen-2021-002034supp001.pdf [file rmdopen-2021-002034supp001.pdf]

### ICMJE DISCLOSURE FORM

Date: \_\_\_\_\_ August 10, 2021

Your Name: \_\_\_\_\_ David T. Felson \_\_\_\_\_

Manuscript Title: \_\_\_\_\_

Manuscript number (if known): \_\_\_\_\_ ar21-0954 \_\_\_\_\_

In the interest of transparency, we ask you to disclose all relationships/activities/interests listed below that are related to the content of your manuscript. "Related" means any relation with for-profit or not-for-profit third parties whose interests may be affected by the content of the manuscript. Disclosure represents a commitment to transparency and does not necessarily indicate a bias. If you are in doubt about whether to list a relationship/activity/interest, it is preferable that you do so.

The following questions apply to the author's relationships/activities/interests as they relate to the **current manuscript only**.

The author's relationships/activities/interests should be **defined broadly**. For example, if your manuscript pertains to the epidemiology of hypertension, you should declare all relationships with manufacturers of antihypertensive medication, even if that medication is not mentioned in the manuscript.

In item #1 below, report all support for the work reported in this manuscript without time limit. For all other items, the time frame for disclosure is the past 36 months.

|                                                           |                                                                                                                                                                                | Name all entities with whom you have this relationship or indicate none (add rows as needed) | Specifications/Comments (e.g., if payments were made to you or to your institution) |
|-----------------------------------------------------------|--------------------------------------------------------------------------------------------------------------------------------------------------------------------------------|----------------------------------------------------------------------------------------------|-------------------------------------------------------------------------------------|
| <b>Time frame: Since the initial planning of the work</b> |                                                                                                                                                                                |                                                                                              |                                                                                     |
| 1                                                         | All support for the present manuscript (e.g., funding, provision of study materials, medical writing, article processing charges, etc.)<br><b>No time limit for this item.</b> | <input checked="" type="checkbox"/> None                                                     |                                                                                     |
|                                                           |                                                                                                                                                                                |                                                                                              |                                                                                     |
|                                                           |                                                                                                                                                                                |                                                                                              |                                                                                     |
|                                                           |                                                                                                                                                                                |                                                                                              |                                                                                     |
| <b>Time frame: past 36 months</b>                         |                                                                                                                                                                                |                                                                                              |                                                                                     |
| 2                                                         | Grants or contracts from any entity (if not indicated in item #1 above).                                                                                                       | <input checked="" type="checkbox"/> None                                                     |                                                                                     |
|                                                           |                                                                                                                                                                                |                                                                                              |                                                                                     |
| 3                                                         | Royalties or licenses                                                                                                                                                          | <input checked="" type="checkbox"/> None                                                     |                                                                                     |
|                                                           |                                                                                                                                                                                |                                                                                              |                                                                                     |
|                                                           |                                                                                                                                                                                |                                                                                              |                                                                                     |

|    |                                                                                                              |                                          |  |
|----|--------------------------------------------------------------------------------------------------------------|------------------------------------------|--|
| 4  | Consulting fees                                                                                              | <input checked="" type="checkbox"/> None |  |
|    |                                                                                                              |                                          |  |
| 5  | Payment or honoraria for lectures, presentations, speakers bureaus, manuscript writing or educational events | <input checked="" type="checkbox"/> None |  |
|    |                                                                                                              |                                          |  |
| 6  | Payment for expert testimony                                                                                 | <input checked="" type="checkbox"/> None |  |
|    |                                                                                                              |                                          |  |
| 7  | Support for attending meetings and/or travel                                                                 | <input checked="" type="checkbox"/> None |  |
|    |                                                                                                              |                                          |  |
| 8  | Patents planned, issued or pending                                                                           | <input checked="" type="checkbox"/> None |  |
|    |                                                                                                              |                                          |  |
| 9  | Participation on a Data Safety Monitoring Board or Advisory Board                                            | <input checked="" type="checkbox"/> None |  |
|    |                                                                                                              |                                          |  |
| 10 | Leadership or fiduciary role in other board, society, committee or advocacy group, paid or unpaid            | <input checked="" type="checkbox"/> None |  |
|    |                                                                                                              |                                          |  |
| 11 | Stock or stock options                                                                                       | <input checked="" type="checkbox"/> None |  |
|    |                                                                                                              |                                          |  |
| 12 | Receipt of equipment, materials, drugs, medical writing, gifts or other services                             | <input checked="" type="checkbox"/> None |  |
|    |                                                                                                              |                                          |  |
| 13 | Other financial or non-financial interests                                                                   | <input checked="" type="checkbox"/> None |  |
|    |                                                                                                              |                                          |  |

Please place an "X" next to the following statement to indicate your agreement:

I certify that I have answered every question and have not altered the wording of any of the questions on this form.

### ICMJE DISCLOSURE FORM

Date: August 9, 2021

Your Name: Diane Lacaille

Manuscript Title: Reexamining Remission Definitions in Rheumatoid Arthritis: Considering DAS28, CRP and Patient Global Assessment

Manuscript number (if known): ar-21-0954

In the interest of transparency, we ask you to disclose all relationships/activities/interests listed below that are related to the content of your manuscript. "Related" means any relation with for-profit or not-for-profit third parties whose interests may be affected by the content of the manuscript. Disclosure represents a commitment to transparency and does not necessarily indicate a bias. If you are in doubt about whether to list a relationship/activity/interest, it is preferable that you do so.

The following questions apply to the author's relationships/activities/interests as they relate to the **current manuscript only**.

The author's relationships/activities/interests should be **defined broadly**. For example, if your manuscript pertains to the epidemiology of hypertension, you should declare all relationships with manufacturers of antihypertensive medication, even if that medication is not mentioned in the manuscript.

In item #1 below, report all support for the work reported in this manuscript without time limit. For all other items, the time frame for disclosure is the past 36 months.

|                                                           |                                                                                                                                                                                | Name all entities with whom you have this relationship or indicate none (add rows as needed) | Specifications/Comments (e.g., if payments were made to you or to your institution) |
|-----------------------------------------------------------|--------------------------------------------------------------------------------------------------------------------------------------------------------------------------------|----------------------------------------------------------------------------------------------|-------------------------------------------------------------------------------------|
| <b>Time frame: Since the initial planning of the work</b> |                                                                                                                                                                                |                                                                                              |                                                                                     |
| 1                                                         | All support for the present manuscript (e.g., funding, provision of study materials, medical writing, article processing charges, etc.)<br><b>No time limit for this item.</b> | <u> X </u> None                                                                              |                                                                                     |
|                                                           |                                                                                                                                                                                |                                                                                              |                                                                                     |
|                                                           |                                                                                                                                                                                |                                                                                              |                                                                                     |
|                                                           |                                                                                                                                                                                |                                                                                              |                                                                                     |
|                                                           |                                                                                                                                                                                |                                                                                              |                                                                                     |
| <b>Time frame: past 36 months</b>                         |                                                                                                                                                                                |                                                                                              |                                                                                     |
| 2                                                         | Grants or contracts from any entity (if not indicated in item #1 above).                                                                                                       | <u> X </u> None                                                                              |                                                                                     |
|                                                           |                                                                                                                                                                                |                                                                                              |                                                                                     |
| 3                                                         | Royalties or licenses                                                                                                                                                          | <u> X </u> None                                                                              |                                                                                     |
|                                                           |                                                                                                                                                                                |                                                                                              |                                                                                     |
| 4                                                         | Consulting fees                                                                                                                                                                | <u> X </u> None                                                                              |                                                                                     |

|    |                                                                                                              |                                          |  |
|----|--------------------------------------------------------------------------------------------------------------|------------------------------------------|--|
|    |                                                                                                              |                                          |  |
| 5  | Payment or honoraria for lectures, presentations, speakers bureaus, manuscript writing or educational events | <input checked="" type="checkbox"/> None |  |
| 6  | Payment for expert testimony                                                                                 | <input checked="" type="checkbox"/> None |  |
| 7  | Support for attending meetings and/or travel                                                                 | <input type="checkbox"/> None            |  |
| 8  | Patents planned, issued or pending                                                                           | <input checked="" type="checkbox"/> None |  |
| 9  | Participation on a Data Safety Monitoring Board or Advisory Board                                            | <input checked="" type="checkbox"/> None |  |
| 10 | Leadership or fiduciary role in other board, society, committee or advocacy group, paid or unpaid            | <input checked="" type="checkbox"/> None |  |
| 11 | Stock or stock options                                                                                       | <input checked="" type="checkbox"/> None |  |
| 12 | Receipt of equipment, materials, drugs, medical writing, gifts or other services                             | <input checked="" type="checkbox"/> None |  |
| 13 | Other financial or non-financial interests                                                                   | <input checked="" type="checkbox"/> None |  |

Please place an "X" next to the following statement to indicate your agreement:

I certify that I have answered every question and have not altered the wording of any of the questions on this form.

## ICMJE DISCLOSURE FORM

**Date:** 8/5/2021

**Your Name:** Michael LaValley

**Manuscript Title:** Reexamining Remission Definitions in Rheumatoid Arthritis: Considering DAS28, CRP and Patient Global Assessment

**Manuscript number (if known):** ar-21-0954

In the interest of transparency, we ask you to disclose all relationships/activities/interests listed below that are related to the content of your manuscript. "Related" means any relation with for-profit or not-for-profit third parties whose interests may be affected by the content of the manuscript. Disclosure represents a commitment to transparency and does not necessarily indicate a bias. If you are in doubt about whether to list a relationship/activity/interest, it is preferable that you do so.

The following questions apply to the author's relationships/activities/interests as they relate to the **current manuscript only**.

The author's relationships/activities/interests should be **defined broadly**. For example, if your manuscript pertains to the epidemiology of hypertension, you should declare all relationships with manufacturers of antihypertensive medication, even if that medication is not mentioned in the manuscript.

In item #1 below, report all support for the work reported in this manuscript without time limit. For all other items, the time frame for disclosure is the past 36 months.

|                                                           |                                                                                                                                                                                | Name all entities with whom you have this relationship or indicate none (add rows as needed) | Specifications/Comments (e.g., if payments were made to you or to your institution)                 |
|-----------------------------------------------------------|--------------------------------------------------------------------------------------------------------------------------------------------------------------------------------|----------------------------------------------------------------------------------------------|-----------------------------------------------------------------------------------------------------|
| <b>Time frame: Since the initial planning of the work</b> |                                                                                                                                                                                |                                                                                              |                                                                                                     |
| 1                                                         | All support for the present manuscript (e.g., funding, provision of study materials, medical writing, article processing charges, etc.)<br><b>No time limit for this item.</b> | NIH/NIAMS                                                                                    | Institutional funding for the Clinical Epidemiology Research and Training Unit at Boston University |
|                                                           |                                                                                                                                                                                |                                                                                              |                                                                                                     |
|                                                           |                                                                                                                                                                                |                                                                                              |                                                                                                     |
|                                                           |                                                                                                                                                                                |                                                                                              |                                                                                                     |
|                                                           |                                                                                                                                                                                |                                                                                              |                                                                                                     |
| <b>Time frame: past 36 months</b>                         |                                                                                                                                                                                |                                                                                              |                                                                                                     |
| 2                                                         | Grants or contracts from any entity (if not indicated in item #1 above).                                                                                                       | None                                                                                         |                                                                                                     |
|                                                           |                                                                                                                                                                                |                                                                                              |                                                                                                     |
| 3                                                         | Royalties or licenses                                                                                                                                                          | None                                                                                         |                                                                                                     |
|                                                           |                                                                                                                                                                                |                                                                                              |                                                                                                     |
|                                                           |                                                                                                                                                                                |                                                                                              |                                                                                                     |

|    |                                                                                                              |                                  |                                                                                                               |
|----|--------------------------------------------------------------------------------------------------------------|----------------------------------|---------------------------------------------------------------------------------------------------------------|
| 4  | Consulting fees                                                                                              | ___None                          |                                                                                                               |
| 5  | Payment or honoraria for lectures, presentations, speakers bureaus, manuscript writing or educational events | ___None                          |                                                                                                               |
| 6  | Payment for expert testimony                                                                                 | ___None                          |                                                                                                               |
| 7  | Support for attending meetings and/or travel                                                                 | ___None                          |                                                                                                               |
| 8  | Patents planned, issued or pending                                                                           | ___None                          |                                                                                                               |
| 9  | Participation on a Data Safety Monitoring Board or Advisory Board                                            | NIH/NIAMS                        | Member of the Observational Study Monitoring Board (OSMB) for the Osteoporotic Fractures in Men Study (MrOS). |
| 10 | Leadership or fiduciary role in other board, society, committee or advocacy group, paid or unpaid            | American College of Rheumatology | Associate Editor for the journal <i>Arthritis Care &amp; Research</i>                                         |
| 11 | Stock or stock options                                                                                       | ___None                          |                                                                                                               |
| 12 | Receipt of equipment, materials, drugs, medical writing, gifts or other services                             | ___None                          |                                                                                                               |
| 13 | Other financial or non-financial interests                                                                   | ___None                          |                                                                                                               |

Please place an "X" next to the following statement to indicate your agreement:

**X** I certify that I have answered every question and have not altered the wording of any of the questions on this form.

## ICMJE DISCLOSURE FORM

Date: \_\_\_ Aug 8,  
2021 \_\_\_\_\_

Your Name: \_\_\_ Daniel  
Aletaha \_\_\_\_\_  
\_\_\_\_\_ Manuscript Title: \_\_\_ Reexamining Remission Definitions in Rheumatoid  
Arthritis: Considering DAS28, CRP and Patient Global Assessment \_\_\_  
Manuscript number (if  
known): \_\_\_\_\_

In the interest of transparency, we ask you to disclose all relationships/activities/interests listed below that are related to the content of your manuscript. "Related" means any relation with for-profit or not-for-profit third parties whose interests may be affected by the content of the manuscript. Disclosure represents a commitment to transparency and does not necessarily indicate a bias. If you are in doubt about whether to list a relationship/activity/interest, it is preferable that you do so.

The following questions apply to the author's relationships/activities/interests as they relate to the current manuscript only.

The author's relationships/activities/interests should be defined broadly. For example, if your manuscript pertains to the epidemiology of hypertension, you should declare all relationships with manufacturers of antihypertensive medication, even if that medication is not mentioned in the manuscript.

In item #1 below, report all support for the work reported in this manuscript without time limit. For all other items, the time frame for disclosure is the past 36 months.

|   |                                                        | Name all entities with whom you have this relationship or indicate none (add rows as needed) | Specifications/Comments (e.g., if payments were made to you or to your institution) |
|---|--------------------------------------------------------|----------------------------------------------------------------------------------------------|-------------------------------------------------------------------------------------|
|   |                                                        | Time frame: Since the initial planning of the work                                           |                                                                                     |
| 1 | All support for the present manuscript (e.g., funding, | ___ None                                                                                     |                                                                                     |
|   |                                                        |                                                                                              |                                                                                     |

|                                   |                                                                                                                  |                                                                           |  |
|-----------------------------------|------------------------------------------------------------------------------------------------------------------|---------------------------------------------------------------------------|--|
|                                   | provision of study materials, medical writing, article processing charges, etc.)<br>No time limit for this item. |                                                                           |  |
|                                   |                                                                                                                  |                                                                           |  |
|                                   |                                                                                                                  |                                                                           |  |
|                                   |                                                                                                                  |                                                                           |  |
|                                   |                                                                                                                  |                                                                           |  |
| <b>Time frame: past 36 months</b> |                                                                                                                  |                                                                           |  |
| 2                                 | Grants or contracts from any entity (if not indicated in item #1 above).                                         | Abbvie, Amgen, Lilly, Novartis, Roche, SoBi, Sanofi                       |  |
|                                   |                                                                                                                  |                                                                           |  |
|                                   |                                                                                                                  |                                                                           |  |
| 3                                 | Royalties or licenses                                                                                            | ___ None                                                                  |  |
|                                   |                                                                                                                  |                                                                           |  |
|                                   |                                                                                                                  |                                                                           |  |
| 4                                 | Consulting fees                                                                                                  | ___ Abbvie, Amgen, Lilly, Janssen, Merck, Novartis, Pfizer, Roche, Sandoz |  |
|                                   |                                                                                                                  |                                                                           |  |
|                                   |                                                                                                                  |                                                                           |  |
| 5                                 | Payment or honoraria for lectures, presentations, speakers bureaus, manuscript writing or educational events     | ___ as in 4                                                               |  |
|                                   |                                                                                                                  |                                                                           |  |
|                                   |                                                                                                                  |                                                                           |  |
| 6                                 | Payment for expert testimony                                                                                     | ___ None                                                                  |  |
|                                   |                                                                                                                  |                                                                           |  |
|                                   |                                                                                                                  |                                                                           |  |
| 7                                 | Support for attending meetings and/or travel                                                                     | ___ None                                                                  |  |
|                                   |                                                                                                                  |                                                                           |  |
|                                   |                                                                                                                  |                                                                           |  |
| 8                                 | Patents planned, issued or                                                                                       | ___ None                                                                  |  |



|    |                                                                                                   |                               |  |
|----|---------------------------------------------------------------------------------------------------|-------------------------------|--|
|    | pending                                                                                           |                               |  |
| 9  | Participation on a Data Safety Monitoring Board or Advisory Board                                 | <input type="checkbox"/> None |  |
|    |                                                                                                   |                               |  |
|    |                                                                                                   |                               |  |
| 10 | Leadership or fiduciary role in other board, society, committee or advocacy group, paid or unpaid | <input type="checkbox"/> None |  |
|    |                                                                                                   |                               |  |
|    |                                                                                                   |                               |  |
| 11 | Stock or stock options                                                                            | <input type="checkbox"/> None |  |
|    |                                                                                                   |                               |  |
|    |                                                                                                   |                               |  |
| 12 | Receipt of equipment, materials, drugs, medical writing, gifts or other services                  | <input type="checkbox"/> None |  |
|    |                                                                                                   |                               |  |
|    |                                                                                                   |                               |  |
| 13 | Other financial or nonfinancial interests                                                         | <input type="checkbox"/> None |  |
|    |                                                                                                   |                               |  |
|    |                                                                                                   |                               |  |

Please place an "X" next to the following statement to indicate your agreement:

I certify that I have answered every question and have not altered the wording of any of the questions on this form.
